1 <http://dx.doi.org/10.1101/079087>  
2 **CONTINUATION: Evaluation of adaptive**  
3 **somatic models in a gold standard whole**  
4 **genome somatic dataset**

5 **Fabien Campagne<sup>1</sup>**

6 <sup>1</sup>The HRH Prince Alwaleed Bin Talal Bin Abdulaziz Alsaud Institute for Computational  
7 Biomedicine, Weill Cornell Medicine, New York, NY, United States of  
8 America; Department of Physiology and Biophysics, Weill Cornell Medicine, New York,  
9 NY, United States of America; E-mail: [fac2003@campagnelab.org](mailto:fac2003@campagnelab.org)

10 **ABSTRACT**

11 In <http://dx.doi.org/10.1101/079087>, we presented adaptive models for calling somatic mutations in  
12 high-throughput sequencing data. These models were developed by training deep neural networks  
13 with semi-simulated data. In this continuation, I evaluate how such models can predict known somatic  
14 mutations in a real dataset. To address this question, I tested the approach using samples from the  
15 International Cancer Genome Consortium (ICGC) and the previously published ground-truth mutations  
16 (GoldSet). This evaluation revealed that training models with semi-simulation does produce models  
17 that exhibit strong performance in real datasets. I found a linear relationship between the performance  
18 observed on a semi-simulated validation set and independent ground-truth in the gold set ( $R^2 = 0.952$ ,  
19  $P < 2^{-16}$ ). I also found that semi-simulation can be used to pre-train models before continuing training  
20 with true labels and that this pre-training improves model performance substantially on the real dataset  
21 compared to training models only with the real dataset. The best model pre-trained with semi-simulation  
22 achieved an AUC of 0.969 [0.957-0.982] (95% confidence interval) compared to 0.911 [0.890-0.932]  
23 when training with real labels only. These data demonstrate that semi-simulation can be a very effective  
24 approach to training filtering and ranking probabilistic models.

25 **Keywords:** Deep Learning, Machine Learning, Somatic Variation Caller, Semi-simulated Data

26 **INTRODUCTION**

27 This manuscript is a continuation to Torracinta et al. [2016]<sup>1</sup>. The reader is referred to Torracinta et al.  
28 [2016] for background and details of the adaptive deep learning concept tested in this continuation.

---

<sup>1</sup>A continuation is a preprint that continues where an earlier preprint left off. The term can also be used to refer to the initial preprint and one or more continuations of the preprint.

The title of a continuation starts with the DOI of the first preprint in a continuation, followed by the word CONTINUATION in uppercase and a colon. A short sentence summarizes the results presented in the continuation. Authors of a continuation should be listed who have contributed to the material presented in the continuation, rather than to the original preprint (since these authors received credit in the first preprint already).

Instead of repeating introduction and methods that are common with the prior preprint, or revising the initial preprint and force readers to read old material to discover new one, this format encourages brevity of reporting. New results or changes to methods are reported in a continuation. An important advantage of the continuation format is that it makes it possible to report results chronologically in preprints, and clearly expose the steps taken during a research study.

A manuscript submitted for publication may later show only a subset of the results presented in these preprints, and may change the order of results in its presentation, in order to improve clarity for readers who encounter the ideas for the first time. Since the article can cite the preprints, it is understood that chronology is described accurately in the continuation format, while the peer-reviewed article is a simplifying summary designed to distill the key elements of a new scientific contribution.

## 29 RESULTS

30 Following our earlier presentation of deep-learning methods to train probabilistic models for somatic  
31 variation calling, I evaluated the performance of adaptive models with data from the International Cancer  
32 Genome Consortium (ICGC). The ICGC recently published a benchmark dataset: the ICGC GoldSet  
33 Alioto et al. [2015].

34 The ICGC GoldSet consists of data from a matched normal and tumor sample, which both have been  
35 subjected to high coverage sequencing (e.g., about 300x). The high-coverage data were used by members  
36 of the Alioto study to determine the ground truth of somatic variation in the tumor sample. Using these  
37 data, new somatic mutation calling approaches can be evaluated in the reduced coverage datasets using  
38 ground-truth variations. A drawback of the ICGC GoldSet evaluation protocol is that some mutations with  
39 low frequencies (e.g., 10%) that are visible in the 300x data can be undetectable in the reduced coverage  
40 datasets. Such mutations are labeled as "GOLD" only in Supplementary Table 1 of Alioto et al. [2015],  
41 because they were called only in the high-coverage dataset and could not be identified by any caller in the  
normal coverage dataset.

|               | # Training Examples | # Validation Examples | # Test examples | # Features |
|---------------|---------------------|-----------------------|-----------------|------------|
| ICGC-10 semi  | 21,137,888          | 1,172,049             | 1,173,442       | 280        |
| ICGC gold-set | 37,920              | 18,690                | N/A             | 280        |

Table 1. Dataset Characteristics

42

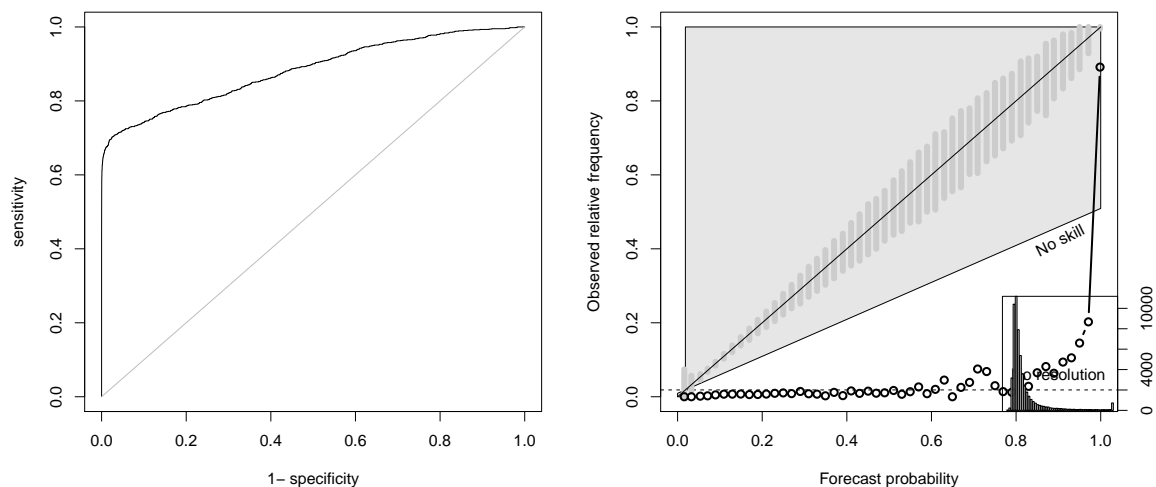

**Figure 1. Receiver Operating Characteristic (ROC) Curve and Reliability Diagram for model predictions on GoldSet.** A model trained exclusively by semi-simulation (simulated labels only) is evaluated on gold standard ground truth from the ICGC GoldSet (Alioto et al. [2015]). Left presents the ROC curve. Right presents the reliability diagram. Forecast probability is the probability generated by the model. Observed relative frequency is the proportion of true labels in a set of sites. Both plots indicate that the model performs extremely well for a majority of sites (corresponding to about 65% sensitivity), then has degraded performance and fails to identify some true positive sites described in the ICGC GoldSet. Despite the drop in performance such a model is suitable for prediction in a real dataset because strong performance is obtained for sites with highest forecast probabilities.

43 To evaluate semi-simulation, I trained adaptive models using the ICGC GoldSet normal and tumor  
44 samples (see Methods). In the absence of two germline samples, I used the tumor sample as the sample in  
45 which semi-simulation plants mutations. The drawback of this training protocol is that the probability of  
46 mutation can be slightly underestimated at the true mutation sites. The model was trained with a random

47 sample of 10% of the sites sequenced by ICGC. Site sampling was random and made no attempt to include  
48 the true mutation sites described by ICGC (in supplementary material of Alioto et al. [2015]). If some true  
49 sites are included in the semi-simulated dataset, their label is completely controlled by semi-simulation,  
50 and not influenced by the GoldSet ground-truth. Table 1 provides a description of the training, validation  
51 and test sets used to train semi-simulation models with these data (ICGC-10 semi).

52 The model trained on ICGC-10 obtained an AUC of 0.9581 on the validation set and a test set AUC of  
53 0.955 (95% confidence interval [0.951-0.959], calculated using 10,000 random examples from the test set,  
54 see Methods).

55 To determine if such a semi-simulation trained model can be predictive on a real dataset, I evaluated  
56 the performance of the model on the ICGC gold-set dataset (labeled ICGC gold-set in Table 1). The  
57 model obtained an Area Under the ROC Curve (AUC) of 0.883 [0.870-0.896] 95% confidence interval.  
58 While the model suffers a drop in performance on the real dataset, it is clearly predictive despite having  
59 been trained only with simulated labels for this dataset. Figure 1 shows the Received Operating Curve  
60 (ROC) for this model on the GoldSet (left) and the reliability diagram (right). The ROC indicates that  
61 the model performs well for a majority of true mutations in the ICGC GoldSet. The reliability diagram  
62 shows that predictions assigned a strong probability by the model (e.g., > 0.90) have an 85% chance of  
63 being true positives. These performance measures are similar, albeit not directly comparable, with the  
64 ones reported for state of the art somatic mutation callers in Alioto et al. [2015].

### Semi-simulation/GoldSet agreement

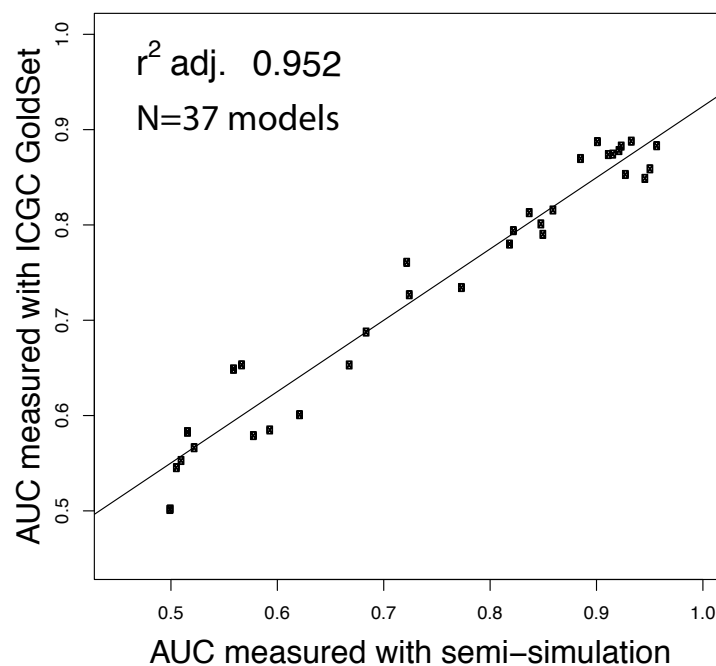

**Figure 2. Performance of alternative models.** Alternative models can be constructed by varying hyper-parameters of the training procedure (number of training examples used, learning rate, dropout rate, L2 regularization rate). Most of the alternative models are expected to have sub-optimal performance. This plot compares the performance of alternative models obtained on the validation set to the performance obtained on the GoldSet. The strong linear fit ( $R^2=0.952$ ,  $P < 2^{-16}$ ,  $N=37$  alternative models) with a slope of 0.75 indicates that hyper-parameter search on a semi-simulated dataset can guide model selection even in the absence of a real dataset.

65 To better characterize how performance of semi-simulated models translate to the GoldSet, I generated  
66 a number of alternative models with random hyper-parameter choices. As usual when sampling hyper-  
67 parameters, a full range of performance is expected, from non-predictive models (AUC close to 0.5) all  
68 the way to close to the performance of the best model that can be derived from the dataset, but including

69 models of intermediate performance. Figure 2 presents the performance of these alternative models on  
70 the GoldSet. This figure shows an almost linear relationship between performance estimates obtained  
71 on the semi-simulated ICGC-10 validation set and performance on the GoldSet (for models which were  
72 trained exclusively on ICGC-10 with semi-simulation). These data confirm that semi-simulation can help  
73 train models that perform well on a similarly distributed real dataset. Furthermore, the plot establishes  
74 that validation performance on the semi-simulated dataset can be used as a guide for selecting a model  
75 expected to perform well on a real dataset.

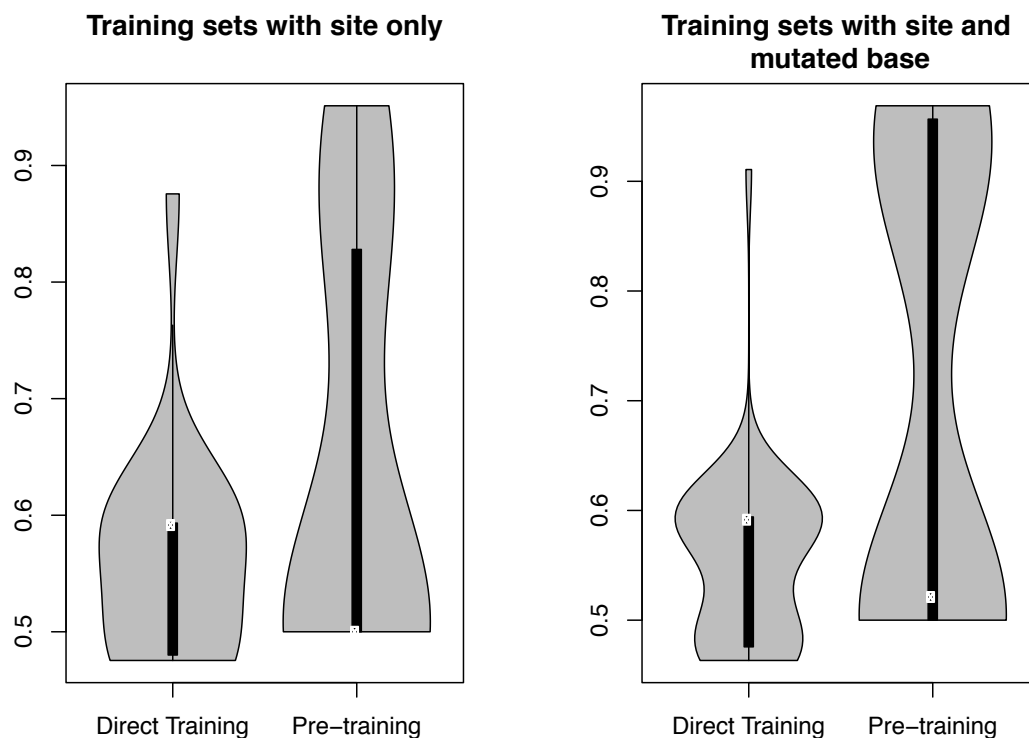

**Figure 3. Impact of semi-simulation pre-training on labeled training.** This experiment looks at the impact of pre-training with semi-simulated datasets on the validation performance of trained models. Each panel shows two violin plots of the model validation AUC. Left: direct training with labeled data from GoldSet. Right: models pre-trained with semi-simulated data before additional training with GoldSet. All models trained to initial convergence (first decrease in validation AUC stops training). I repeat the comparison for two kinds of datasets, one where only the location of the site is used to indicate that the site is a somatic mutation, the other where the site and identity of the base mutated are used to train the model. In each experiment I find that pre-training greatly increases the proportion of high-performing models. The standard error on each AUC estimate for high-performance models is not shown, but is reported in the text for the top performing models. White dots indicate the position of the larger density in each violin plot. Width of the grey shapes indicates the density of points in this region of AUC values.

76 Semi-simulation does not require true labels, and none were used for training the models presented so  
77 far. However, an interesting question is whether performance of semi-simulated models can be improved  
78 in cases where some amount of real labels is available. In this case, a fully trained semi-simulated model  
79 can continue training with a dataset containing real labels. In practice, this can be accomplished by loading  
80 the parameters of a trained model and resuming training with a new training and validation set (with  
81 labels from a real dataset). I have tested this scenario in Figure 3. It compares the performance of about  
82 50 alternative models (sample of hyper-parameter choices) when the model is trained exclusively with the

83 labeled data (Direct training with GoldSet, left), or when the model is trained with the semi-simulated data  
84 (ICGC-10, Pre-training), then re-trained with real data (GoldSet, right). Figure 3 shows that pre-training  
85 with semi-simulated data helps find many more alternative models with strong performance than is  
86 possible when training directly with labeled data from the GoldSet. This can be explained in large part  
87 because the models have about 1.6 million parameters, and are challenging to train in a dataset with only  
88 about 38,000 examples, of which only 700 are identified as somatic variations in the training set. In this  
89 case, pre-training with semi-simulation likely helps optimize most parameters of the model that do not  
90 need to be adjusted when the second training set is presented. As a result, the best models are obtained  
91 with pre-training with semi-simulation (e.g., 0.969 [0.957-0.982]) compared to 0.911 [0.890-0.932] with  
92 direct training.

## 93 **DISCUSSION**

94 While training models with semi-simulated data may appear to train models with no supervised data,  
95 and learn something from nothing, this is not accurate. Semi-simulation relies on an understanding of  
96 the process that generates the labels, to simulate true signal and plant it in real, noisy, datasets. Semi-  
97 simulation therefore substitutes a conceptual model of a process, implemented in a simulation tool, to the  
98 usual observations of labels used so far for supervised learning. Semi-simulation is expected to help in  
99 cases where the process that generates the signal is sufficiently well understood that reasonably realistic  
100 simulations can be developed. Simulation of somatic mutations is one such problem where simulating  
101 mutations is orders of magnitude more cost effective than developing benchmark datasets to identify  
102 true mutations. Semi-simulation is therefore expected to be useful in applications where conceptual  
103 models are developed (e.g., in scientific research). It would be much less useful in applications of deep  
104 learning to domains where collecting labeled data is more cost-effective (e.g., face recognition in pictures,  
105 reinforcement learning to learn to play games).

106 Taken together, these results indicate that models trained with semi-simulation can yield competitive  
107 ranking and filtering approaches for genomic datasets. This evidence is important because semi-simulation  
108 makes it possible to develop models for specific assays and analysis protocols, which can adapt to the  
109 noise characteristics of assay and analysis methods, as we have illustrated in our first report about  
110 semi-simulation Torracinta et al. [2016].

111 I also showed that pre-training models with semi-simulated datasets can help train more predictive  
112 models. This result is important because it suggests that semi-simulation can be used not only to train  
113 models when large amounts of labeled data are not available, i.e., such as for a new assay, but also when  
114 labeled data starts to become available. We can therefore envision developing models for new assays  
115 with semi-simulation only, and iteratively refining the models as more labeled data are produced (e.g., by  
116 independent experimental validation of results ranked by prior iterations of the models). I anticipate that  
117 this iterative model development approach will yield state of the art filtering and ranking models for many  
118 assays.

## 119 **METHODS**

### 120 **GoldSet sample processing**

121 ICGC GoldSet samples for normal and tumor samples were downloaded from the European Genomics  
122 Archive (EGA) using accession code EGAD00001001859 in the FASTQ format.

123 Reads were converted to the Goby compact-reads format Campagne et al. [2013]: EGAD00001001859-  
124 LA-tumor 619,412,062 reads, 96.5 GB, EGAD00001001859-LA-normal 456,984,733 reads, 72.6 GB.

125 Compact-reads were uploaded to an internal instance of GobyWeb Dorff et al. [2013]. Reads  
126 were aligned with GobyWeb using bwa-mem, implemented in the BWA\_MEM\_ARTIFACT Goby  
127 Web plugin ([https://github.com/CampagneLaboratory/gobyweb2-plugins/tree/  
128 plugins-SDK/plugins/aligners/BWA\\_MEM\\_ARTIFACT](https://github.com/CampagneLaboratory/gobyweb2-plugins/tree/plugins-SDK/plugins/aligners/BWA_MEM_ARTIFACT)). This process produced two align-  
129 ments in the Goby format Campagne et al. [2013].

### 130 **Semi-simulation**

131 Normal and tumor alignments were processed with GobyWeb Dorff et al. [2013]. We used the Goby  
132 Web Sequence Base Information plugin (SBI, [https://github.com/CampagneLaboratory/  
133 gobyweb2-plugins/tree/plugins-SDK/plugins/analyses/SEQUENCE\\_BASE\\_](https://github.com/CampagneLaboratory/gobyweb2-plugins/tree/plugins-SDK/plugins/analyses/SEQUENCE_BASE_)

134 INFORMATION) to produce raw and semi-simulated mutated .sbi files. The SBI plugin uses version 1.1  
135 of the variationanalysis project (version 1.0 was described previously Torracinta et al. [2016]). The plugin  
136 was configured to realign reads around indels, call indels and keep sites with at least one base supporting  
137 a variation and keep sites with a single distinct read index.

138 The OneSampleCanonicalSimulationStrategy was used for semi-simulation, which considers sites  
139 canonical when the germline site has up to two alleles with more than 90% of bases. The plugin was  
140 configured to randomly sample 10% of sites across the genome to yield a semi-simulated training set with  
141 23,483,379 genomic sites. This set was randomly split into a training set with 21,137,888 sites, a validation  
142 set with 1,172,049 and a test set with 1,173,442 sites. The normal sample was marked as germline and  
143 the tumor sample was marked as somatic (where mutations will be planted by semi-simulation).

## 144 Feature Mapper

145 The feature mapper used in this work extends that presented in Torracinta et al. [2016] and maps  
146 information about the genomic context of a site (10 bases before and after are one-hot encoded),  
147 the density of insert sizes, read quality and mapping qualities at the site. We used implementation  
148 org.campagnelab.dl.somatic.mappers.FeatureMapperV25 (see Campagne and Torracinta [2016])

## 149 Training with Semi-Simulation

150 Learning rate was set to 5 and training performed with the Adagrad optimizer, which decreases learning  
151 rate for each parameter independently during training. Other hyper-parameters for the model were  
152 searched with the search-hyper-params.sh tool in the variationanalysis project (release 1.1+) to determine  
153 the dropout rate and regularization rate that maximizes AUC on the first 10,000 sites of the validation set  
154 (training models with the first 10,000 sites of the training set). The same model architecture as presented  
155 in Torracinta et al. [2016] was used for training models in this continuation. Training with the full training  
156 set was performed on an NVIDIA GPU GTX 1080 with early stopping, using this command line:

```
157 train-somatic.sh 10g -t RRRELWX-mutated-randomized-training.sbi  
158 -v RRRELWX-mutated-randomized-validation.sbi  
159 --learning-rate 5  
160 --net-architecture org.campagnelab.dl.somatic.learning.architecture.\  
161 graphs.SixDenseLayersNarrower2WithFrequencyAndBase  
162 --mini-batch-size 512  
163 --feature-mapper org.campagnelab.dl.somatic.mappers.FeatureMapperV25  
164 -x 10000  
165 --validate-every 1  
166 --regularization-rate 0.01  
167 --dropout-rate 0.9
```

## 168 Hyper-parameters searches

169 Models with various hyper-parameters were produced with the search-hyper-params.sh tool provided  
170 in version 1.1.1 of the variationanalysis project (Campagne and Torracinta [2016]). For instance, for  
171 Figure 2, the following commands generated 100 models with different learning rate:

```
172 search-hyper-params.sh 100 train-somatic.sh 20g  
173 -t RRRELWX-mutated-randomized-training.sbi  
174 -v RRRELWX-mutated-randomized-validation.sbi  
175 --net-architecture org.campagnelab.dl.somatic.learning.architecture.\  
176 graphs.SixDenseLayersNarrower2WithFrequencyAndBase  
177 --mini-batch-size 512  
178 --experimental-condition WithFreqBase  
179 --feature-mapper org.campagnelab.dl.somatic.mappers.FeatureMapperV25  
180 -x 10000  
181 --max-epochs 50  
182 -n ::: 1000 10000 50000 100000 :::
```

### 183 **Gold Standard Data Set**

184 A Gold Standard dataset was constructed with the GobyWeb SBI plugin and the GoldSet annotations  
185 (SNV and indels) to yield a dataset with 79,637 genomic sites of which about 1405 sites are annotated as  
186 mutated and are true mutations in the ICGC gold set (supplementary table to Alioto et al. [2015]).

### 187 **AUC estimations**

188 AUC, or Area Under the Receiver Operating Curve (ROC), was estimated by the exact method, by  
189 calculating the number of pairs of positive and negative examples where the positive example scores  
190 higher than the negative, and dividing by the number of pairs. Standard error of the AUC was estimated  
191 with the method of Hanley and McNeil [1982]. 95% Confidence intervals were derived by adding  
192 and subtracting 2.96 times the standard error to the AUC estimate. This calculation is implemented  
193 by the variationanalysis predict.sh tool. When evaluating performance for several models, I used the  
194 predict-all.sh tool of variation analysis. For instance, to estimate AUC of models shown in Figure 2, the  
195 following command was used:

```
196 predict-all.sh gold-predictions-tobases.sbi
```

197 The previous command scans the models defined in the model-conditions.txt file and evaluates the  
198 performance of each model again the dataset provided in argument.

## 199 **REFERENCES**

- 200 Tyler S Alioto, Ivo Buchhalter, Sophia Derdak, Barbara Hutter, Matthew D Eldridge, Eivind Hovig,  
201 Lawrence E Heisler, Timothy A Beck, Jared T Simpson, Laurie Tonon, et al. A comprehensive assess-  
202 ment of somatic mutation detection in cancer using whole-genome sequencing. *Nature communications*,  
203 6, 2015.
- 204 Fabien Campagne and Remi Torracinta. VariationAnalysis software, 2016. URL <https://github.com/CampagneLaboratory/variationanalysis>.
- 206 Fabien Campagne, Kevin C. Dorff, Nyasha Chambwe, James T. Robinson, and Jill P. Mesirov. Com-  
207 pression of Structured High-Throughput Sequencing Data. *PLoS ONE*, 8(11):e79871, nov 2013.  
208 ISSN 1932-6203. doi: 10.1371/journal.pone.0079871. URL [http://dx.plos.org/10.1371/](http://dx.plos.org/10.1371/journal.pone.0079871)  
209 [journal.pone.0079871](http://dx.plos.org/10.1371/journal.pone.0079871).
- 210 Kevin C Dorff, Nyasha Chambwe, Zachary Zeno, Manuele Simi, Rita Shaknovich, and Fabien Campagne.  
211 Gobyweb: simplified management and analysis of gene expression and dna methylation sequencing  
212 data. *PLoS One*, 8(7):e69666, 2013.
- 213 James A Hanley and Barbara J McNeil. The meaning and use of the area under a receiver operating  
214 characteristic (roc) curve. *Radiology*, 143(1):29–36, 1982.
- 215 Remi Torracinta, Laurent Mesnard, Susan Levine, Rita Shaknovich, Maureen Hanson, and Fabien  
216 Campagne. Adaptive somatic mutations calls with deep learning and semi-simulated data. *bioRxiv*,  
217 2016. doi: 10.1101/079087. URL [http://biorxiv.org/content/early/2016/10/04/](http://biorxiv.org/content/early/2016/10/04/079087)  
218 [079087](http://biorxiv.org/content/early/2016/10/04/079087).
